# Supplementary material
Source: PubMed Central journal article supplement (PMC4468912)

Supplementary Table S1. QuantiGene Plex 2.0 multiplex assay target RNA transcripts

| <b>Gene</b>    | <b>MC-related function</b>            | <b>PubMed Reference ID</b> |
|----------------|---------------------------------------|----------------------------|
| CCL2 (MCP-1)*  | Induces degranulation                 | 23482464                   |
| CCL5 (RANTES)  | MC chemotaxis                         | 12270118                   |
| CXCL10 (IP-10) | MC chemotaxis                         | 15879427                   |
| ICAM-1         | Upregulated by MC activity            | 7559805                    |
| IFNa4          | Inhibits MC histamine release         | 2469645                    |
| IFNg           | Apoptotic for MC progenitors          | 16116187                   |
| IL-1b          | Increases MC cytokine production      | 10820229                   |
| IL-6*          | Promotes host defense                 | 18832718                   |
| IL-10*         | Immune tolerance                      | 23415912                   |
| IL-17a*        | Pro-arthritic                         | 20200272                   |
| IL-18*         | Promotes host defense                 | 17075246                   |
| IL-33          | MC activation following tissue injury | 21239713                   |
| KitL (SCF)     | Required for MC development           | 7508684                    |
| NGF*           | Neuro-immune interactions             | 8170980                    |
| Nos2 (iNOS)*   | Response to tissue ischemia           | 10744078                   |
| PECAM1         | PBMC expression linked to MCs         | 16211461                   |
| TNFa*          | Pleiotropic effects                   | 1709737                    |
| Vegfa*         | Angiogenesis                          | 23755748                   |
| HPRT           | Reference gene                        | n/a                        |
| Polr2a         | Reference gene                        | n/a                        |

CCL2 (MIP-1), chemokine ligand 2 (monocyte chemotactic protein 1); CCL5 (RANTES), chemokine ligand 5 (regulated on activation, normal T cell expressed and secreted), CXCL10 (IP-10), C-X-C motif chemokine 10 (interferon gamma-induced protein 10); HPRT, hypoxanthine phosphoribosyltransferase; ICAM-1, intercellular adhesion molecule 1; IFN $\alpha$ 4, interferon alpha 4; IFN $\gamma$ , interferon gamma; IL, interleukin; KitL (SCF), kit ligand (stem cell factor); NGF, nerve growth factor; Nos2 (iNOS), nitric oxide synthase 2 (inducible nitric oxide synthase); PECAM, platelet endothelial cell adhesion molecule; Polr2a, polymerase (RNA) II polypeptide a; TNF $\alpha$ , tumor necrosis factor alpha; VEGF-A, vascular endothelial growth factor a. \* denotes gene is a known MC product.

## Supplementary Figure Legends

### Supplementary Figure S1

Multiplex mRNA transcript analysis of MC-associated genes. Of 18 genes analyzed (see Supplementary Table 1) in UI mice and at 24 and 48 hours pi, non-significant trends were observed for elevated IFN $\alpha$ 4, IFN $\gamma$ , and IL-1 $\beta$  expression in WT relative to Kit<sup>W-sh</sup> corneolimbic buttons at 48 hours pi. Results show gene expression relative to the geometric mean of 2 reference genes in individual corneolimbic buttons. Analysis represents tissue from 4 mice per group per time point shown as mean  $\pm$  SEM.

### Supplementary Figure S2

MC-granule products histamine and TNF $\alpha$  do not impact viral titer *in vivo* at 48 hours pi. 1xPBS or 1xPBS containing 1 or 100  $\mu$ M histamine was applied to the corneas of WT (a) and separately in Kit<sup>W-sh</sup> mice (b) at the time of infection. By 48 hours pi, there was no impact on HSV-1 titer in corneas of WT mice by plaque assay ( $n = 5-6$  mice per group; 3 independent experiments). The addition of histamine influenced HSV-1 titer in the corneas of Kit<sup>W-sh</sup> mice ( $n = 3$  mice/group; 2 independent experiments). (c) HSV-1 titer was also compared in the corneas of WT and TNF $\alpha$ <sup>-/-</sup> mice at 48 hours pi ( $n = 4$  mice per group; 3 independent experiments).

Supplementary Figure S1

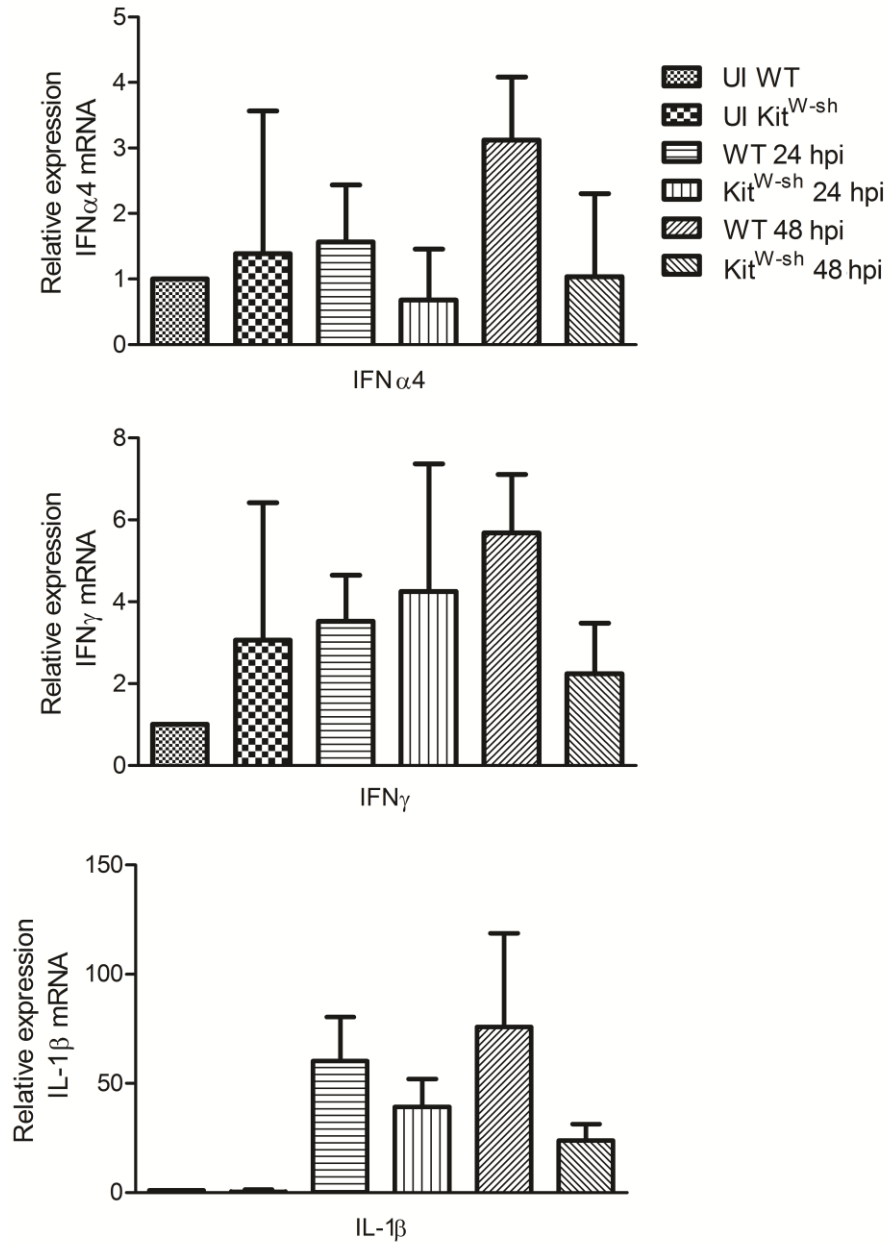

## Supplementary Figure S2

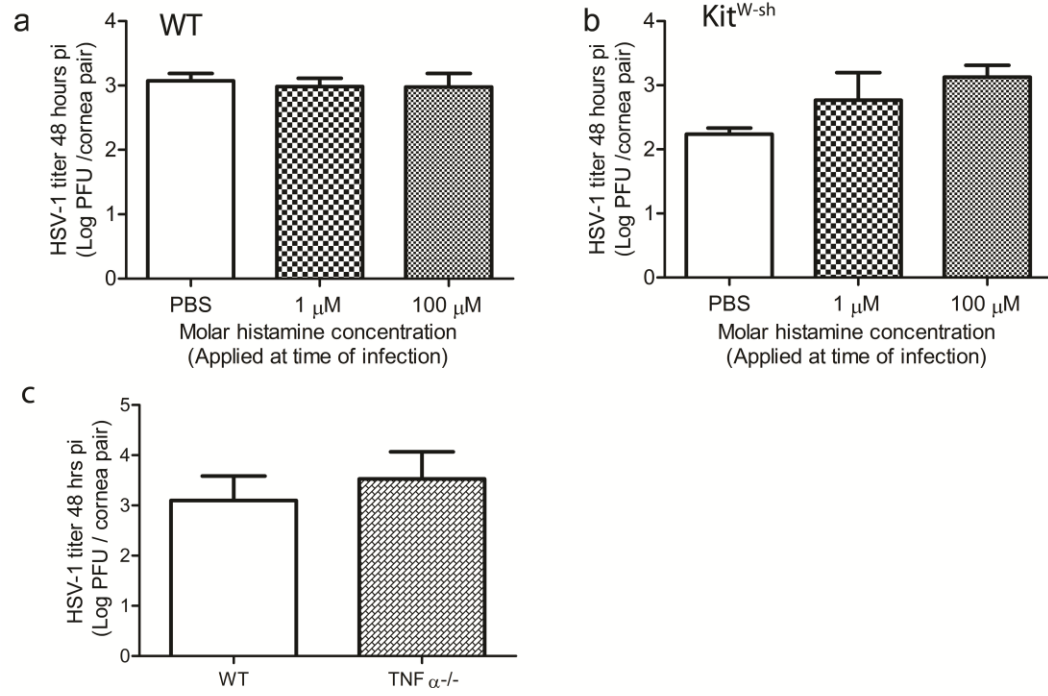

Supplement: i1552-5783-56-6-3763-s01.pdf [file i1552-5783-56-6-3763-s01.pdf]
